# Supplementary material
Source: PubMed Central journal article supplement (PMC8130125)
Supplement: 12915_2021_1038_MOESM1_ESM.pdf [file 12915_2021_1038_MOESM1_ESM.pdf]

Table S1: Average number of tentacular neurons per tentacle in different sized animals.

| Size category | N<br>(12 tentacles/animal) | Mean number of neurons/tentacle* | STDEV | SEM  |
|---------------|----------------------------|----------------------------------|-------|------|
| Small         | 3 animals                  | 45.22                            | 25.17 | 4.20 |
| Medium        | 3 animals                  | 71.94                            | 30.57 | 5.10 |
| Medium-large  | 3 animals                  | 84.92                            | 57.13 | 9.52 |
| Large         | 3 animals                  | 88.88                            | 44.92 | 7.49 |

\*Averages derived from data in supplementary table 2.

Table S2: Number of tentacular neurons in each tentacle of animals of different sizes.

|    | Size category | T1  | T2  | T3  | T4  | T5  | T6  | T7  | T8  | T9  | T10 | T11 | T12 | Min | Max |
|----|---------------|-----|-----|-----|-----|-----|-----|-----|-----|-----|-----|-----|-----|-----|-----|
| 1  | Small         | 59  | 40  | 20  | 39  | 12  | 84  | 72  | 96  | 31  | 63  | 40  | 101 | 20  | 101 |
| 2  | Small         | 33  | 47  | 46  | 19  | 12  | 53  | 57  | 39  | 37  | 82  | 41  | 9   | 9   | 82  |
| 3  | Small         | 13  | 9   | 44  | 83  | 21  | 75  | 60  | 55  | 19  | 38  | 54  | 25  | 9   | 83  |
| 4  | Medium        | 21  | 66  | 47  | 132 | 43  | 81  | 112 | 90  | 25  | 78  | 93  | 34  | 21  | 132 |
| 5  | Medium        | 92  | 87  | 64  | 156 | 65  | 62  | 52  | 71  | 88  | 48  | 70  | 81  | 48  | 156 |
| 6  | Medium        | 86  | 35  | 91  | 107 | 72  | 39  | 56  | 123 | 81  | 64  | 28  | 50  | 28  | 123 |
| 7  | Medium-large  | 34  | 20  | 19  | 49  | 10  | 58  | 40  | 5   | 53  | 42  | 25  | 89  | 5   | 89  |
| 8  | Medium-large  | 131 | 111 | 71  | 51  | 189 | 126 | 99  | 201 | 211 | 142 | 168 | 101 | 51  | 211 |
| 9  | Medium-large  | 32  | 87  | 64  | 107 | 28  | 149 | 186 | 104 | 60  | 48  | 77  | 70  | 32  | 186 |
| 10 | Large         | 167 | 182 | 84  | 53  | 99  | 182 | 121 | 101 | 94  | 145 | 171 | 158 | 53  | 182 |
| 11 | Large         | 66  | 42  | 31  | 17  | 70  | 59  | 18  | 89  | 60  | 67  | 71  | 57  | 17  | 89  |
| 12 | Large         | 129 | 51  | 102 | 104 | 50  | 89  | 99  | 51  | 34  | 102 | 96  | 89  | 34  | 129 |

T= tentacle. All animals that were counted had 12 total tentacles.

Table S3: Number of longitudinal neurons counted in each longitudinal track.

|               | Neurons counted in each of eight longitudinal tracks |    |    |    |    |    |    |    | Mean  | ± SE |
|---------------|------------------------------------------------------|----|----|----|----|----|----|----|-------|------|
| Individual 1  | 12                                                   | 10 | 10 | 12 | 10 | 9  | 14 | 14 | 11.38 | 0.68 |
| Individual 2  | 18                                                   | 18 | 24 | 18 | 20 | 23 | 16 | 17 | 19.25 | 1.01 |
| Individual 3  | 41                                                   | 39 | 40 | 35 | 38 | 38 |    |    | 38.5  | 0.85 |
| Individual 4  | 39                                                   | 41 | 43 | 43 | 40 | 43 | 44 | 44 | 42.13 | 0.67 |
| Individual 5  | 47                                                   | 46 | 49 | 45 | 47 | 46 | 44 | 42 | 45.75 | 0.71 |
| Individual 6  | 50                                                   | 57 | 51 | 47 | 51 | 48 | 43 | 47 | 49.25 | 1.45 |
| Individual 7  | 55                                                   | 54 | 51 | 54 | 53 |    |    |    | 53.4  | 0.68 |
| Individual 8  | 70                                                   | 74 | 74 | 61 | 69 | 69 | 64 | 59 | 67.5  | 1.99 |
| Individual 9  | 63                                                   | 64 | 63 | 69 | 61 | 58 | 69 | 54 | 62.63 | 1.80 |
| Individual 10 | 69                                                   | 67 | 75 | 74 | 67 | 65 | 64 | 67 | 68.5  | 1.41 |

Blank cells show instances where longitudinal neuron counts were not done.

Table S4: Number of tripolar neurons counted in each radial segment.

|               | Neurons counted in each of eight radial segments |    |    |    |    |    |    |     | Mean  | ± SE |
|---------------|--------------------------------------------------|----|----|----|----|----|----|-----|-------|------|
| Individual 1  | 9                                                | 10 | 8  | 10 | 13 | 5  | 12 | 14  | 10.13 | 1.03 |
| Individual 2  | 16                                               | 14 | 22 | 16 | 21 | 18 | 17 | 15  | 17.38 | 1    |
| Individual 3  | 43                                               | 40 | 47 | 40 |    |    |    |     | 42.5  | 1.66 |
| Individual 4  | 44                                               | 48 | 40 | 44 | 47 | 47 |    |     | 45    | 1.21 |
| Individual 5  | 65                                               | 50 | 70 | 57 | 45 |    |    |     | 57.4  | 4.61 |
| Individual 6  | 52                                               | 55 | 51 | 57 | 51 | 48 | 43 | 47  | 50.5  | 1.58 |
| Individual 7  | 54                                               | 55 | 60 | 55 | 51 |    |    |     | 55    | 1.45 |
| Individual 8  | 95                                               | 75 | 95 | 96 | 85 | 96 | 99 | 100 | 92.63 | 2.98 |
| Individual 9  | 87                                               | 86 | 85 | 75 | 76 | 75 |    |     | 80.67 | 2.4  |
| Individual 10 | 83                                               | 92 | 70 | 78 | 77 | 79 | 75 |     | 79.14 | 2.61 |

Blank cells show instances where tripolar neuron counts were not done.
