# Supplementary material
Source: PubMed Central journal article supplement (PMC8130125)
Supplement: 12915_2021_1038_MOESM15_ESM.pdf [file 12915_2021_1038_MOESM15_ESM.pdf]

**Table S5: Full ANOVA model results**

**Fig. 2: *Nematostella* neuronal subtypes scale with changes in size.**

Mixed ANOVA analyses were performed for the data presented in Fig. 1c-e. The main effect of the repeated measure (observation time), between-subject factor (feeding regime), and the interaction effect (time x feeding) are reported for animal length (c), longitudinal neurons (d) and tripolar neurons (e). Main effects were interpreted within the context of any significant interaction effects. Bonferroni post-hoc testing was used to determine pairwise differences. S-F, starved then fed; F-S, fed then starved.

| c) Length                         |                         |          |                        |                   |
|-----------------------------------|-------------------------|----------|------------------------|-------------------|
| Factors                           | <i>Df</i>               | <i>F</i> | <i>P</i>               | $\eta_p^2$        |
| • Observation time                | 2,34                    | 6.63     | <b>0.004</b>           | 0.28              |
| • Feeding regime                  | 1,17                    | 1.02     | 0.326                  | 0.06              |
| • Time x Feeding                  | 2,34                    | 25.75    | <b>&lt; 0.001</b>      | 0.602             |
| <i>Pairwise comparisons:</i>      |                         |          | <i>Mean difference</i> | <i>P</i>          |
| <i>(Feeding by Time)</i>          |                         |          |                        |                   |
| Time 0:                           | S-F vs. F-S             |          | 0.22                   | 0.280             |
| Feeding regime switch:            | S-F vs. F-S             |          | - 0.62                 | <b>0.003</b>      |
| Week 14:                          | S-F vs. F-S             |          | 0.91                   | <b>0.002</b>      |
| <i>(Time by Feeding)</i>          |                         |          |                        |                   |
| S-F:                              | Time 0 vs. Feed switch  |          | 0.32                   | 0.098             |
|                                   | Time 0 vs. Week 14      |          | - 0.72                 | <b>0.002</b>      |
|                                   | Feed switch vs. Week 14 |          | - 1.04                 | <b>&lt; 0.001</b> |
| F-S:                              | Time 0 vs. Feed switch  |          | - 0.52                 | <b>0.008</b>      |
|                                   | Time 0 vs. Week 14      |          | - 0.03                 | 1.00              |
|                                   | Feed switch vs. Week 14 |          | 0.49                   | <b>0.008</b>      |
| d) Number of longitudinal neurons |                         |          |                        |                   |
| Factors                           | <i>Df</i>               | <i>F</i> | <i>P</i>               | $\eta_p^2$        |
| • Observation time                | 2,36                    | 9.91     | <b>&lt; 0.001</b>      | 0.36              |
| • Feeding regime                  | 1,18                    | 0.52     | 0.82                   | 0.003             |
| • Time x Feeding                  | 2,36                    | 77.35    | <b>&lt; 0.001</b>      | 0.81              |
| <i>Pairwise comparisons:</i>      |                         |          | <i>Mean difference</i> | <i>P</i>          |
| <i>(Feeding by Time)</i>          |                         |          |                        |                   |
| Time 0:                           | S-F vs. F-S             |          | 18.3                   | 0.43              |
| Feeding switch:                   | S-F vs. F-S             |          | - 129.6                | <b>0.001</b>      |
| Week 14:                          | S-F vs. F-S             |          | 127.7                  | <b>&lt; 0.001</b> |
| <i>(Time by Feeding)</i>          |                         |          |                        |                   |
| Starved then fed:                 | Time 0 vs. Feed switch  |          | 44.6                   | <b>0.007</b>      |
|                                   | Time 0 vs. Week 14      |          | - 100.3                | <b>&lt; 0.001</b> |
|                                   | Feed switch vs. Week 14 |          | - 144.8                | <b>&lt; 0.001</b> |
| Fed then starved                  | Time 0 vs. Feed switch  |          | - 103.3                | <b>&lt; 0.001</b> |
|                                   | Time 0 vs. Week 14      |          | 9.1                    | 1.00              |
|                                   | Feed switch vs. Week 14 |          | 112.4                  | <b>&lt; 0.001</b> |

| <b>e) Number of tripolar neurons</b> |           |          |                        |                   |
|--------------------------------------|-----------|----------|------------------------|-------------------|
| Factors                              | <i>Df</i> | <i>F</i> | <i>P</i>               | $\eta_p^2$        |
| • Observation time                   | 2,36      | 20.69    | <b>&lt; 0.001</b>      | 0.54              |
| • Feeding regime                     | 1,8       | 2.09     | 0.19                   | 0.21              |
| • Time x Feeding                     | 2,36      | 91.91    | <b>&lt; 0.001</b>      | 0.84              |
| <i>Pairwise comparisons:</i>         |           |          | <i>Mean difference</i> | <i>P</i>          |
| <i>(Feeding by Time)</i>             |           |          |                        |                   |
| Time 0: S-F vs. F-S                  |           |          | 13.4                   | 0.61              |
| Feeding regime switch: S-F vs. F-S   |           |          | - 115.1                | <b>&lt; 0.001</b> |
| Week 14: S-F vs. F-S                 |           |          | 184.6                  | <b>&lt; 0.001</b> |
| <i>(Time by Feeding)</i>             |           |          |                        |                   |
| S-F: Time 0 vs. Feed switch          |           |          | 64.9                   | <b>0.03</b>       |
| Time 0 vs. Week 14                   |           |          | - 147.5                | <b>&lt; 0.001</b> |
| Feed switch vs. Week 14              |           |          | - 212.4                | <b>&lt; 0.001</b> |
| F-S: Time 0 vs. Feed switch          |           |          | - 63.6                 | <b>0.032</b>      |
| Time 0 vs. Week 14                   |           |          | 23.7                   | 0.70              |
| Feed switch vs. Week 14              |           |          | 87.3                   | <b>0.03</b>       |

**Fig. 4: *NvLWamide-like* neuronal subtypes have differential responses during regeneration.** Mixed ANOVA analyses were performed for the data presented in Fig. 4f & h. The main effect of the repeated measure (observation time), between-subject factor (starting size category), and the interaction effect (time x size) are reported for longitudinal (f) and tripolar neurons (h). Main effects were interpreted within the context of any significant interaction effects. Bonferroni post-hoc testing was used to determine pairwise differences. Greenhouse-Geisser corrected *F* statistics are reported for longitudinal and tripolar data sets (f, h), due to a lack of sphericity. Dpa, days post amputation; hpa, hours post amputation.

| <b>f) Regeneration of longitudinal neurons</b> |                         |                        |                |            |
|------------------------------------------------|-------------------------|------------------------|----------------|------------|
| Factors                                        | <i>Df</i>               | <i>F</i>               | <i>P</i>       | $\eta_p^2$ |
| • Observation time                             | 1.7,134.4               | 83.95                  | < <b>0.001</b> | 0.52       |
| • Starting size                                | 3,79                    | 79.11                  | < <b>0.001</b> | 0.75       |
| • Time x Size                                  | 5.1,134.4               | 13.46                  | < <b>0.001</b> | 0.34       |
| <i>Pairwise comparisons:</i>                   |                         | <i>Mean difference</i> |                | <i>P</i>   |
| <i>(Time by Size)</i>                          |                         |                        |                |            |
| Small:                                         | Time 0 cut vs. 24 hpa   | 3.3                    | < <b>0.001</b> |            |
|                                                | Time 0 cut vs. 7 dpa    | - 1.0                  | 0.99           |            |
|                                                | 24 hpa vs. 7 dpa        | - 4.3                  | < <b>0.001</b> |            |
| Medium:                                        | Time 0 cut vs. 24 hpa   | 6.1                    | < <b>0.001</b> |            |
|                                                | Time 0 cut vs. 7 dpa    | -0.6                   | 1.00           |            |
|                                                | 24 hpa vs. 7 dpa        | - 6.6                  | < <b>0.001</b> |            |
| Medium-large:                                  | Time 0 cut vs. 24 hpa   | 6.9                    | < <b>0.001</b> |            |
|                                                | Time 0 cut vs. 7 dpa    | 4.4                    | <b>0.003</b>   |            |
|                                                | 24 hpa vs. 7 dpa        | - 2.5                  | 0.25           |            |
| Large:                                         | Time 0 cut vs. 24 hpa   | 12.8                   | < <b>0.001</b> |            |
|                                                | Time 0 cut vs. 7 dpa    | 10.6                   | < <b>0.001</b> |            |
|                                                | 24 hpa vs. 7 dpa        | - 2.1                  | 0.34           |            |
| <i>(Size by Time)</i>                          |                         |                        |                |            |
| Time 0 cut:                                    | Small vs. Medium        | - 9.9                  | < <b>0.001</b> |            |
|                                                | Small vs. Medium-large  | - 17.5                 | < <b>0.001</b> |            |
|                                                | Small vs. Large         | - 27.1                 | < <b>0.001</b> |            |
|                                                | Medium vs. Medium-large | - 7.7                  | < <b>0.001</b> |            |
|                                                | Medium vs. Large        | - 17.2                 | < <b>0.001</b> |            |
|                                                | Medium-large vs. Large  | - 9.5                  | < <b>0.001</b> |            |
| 24 hpa:                                        | Small vs. Medium        | - 7.2                  | < <b>0.001</b> |            |
|                                                | Small vs. Medium-large  | -14.0                  | < <b>0.001</b> |            |
|                                                | Small vs. Large         | - 17.6                 | < <b>0.001</b> |            |
|                                                | Medium vs. Medium-large | - 6.8                  | < <b>0.001</b> |            |
|                                                | Medium vs. Large        | - 10.5                 | < <b>0.001</b> |            |
|                                                | Medium-large vs. Large  | - 3.7                  | 0.19           |            |
| 7 dpa:                                         | Small vs. Medium        | - 9.5                  | < <b>0.001</b> |            |
|                                                | Small vs. Medium-large  | - 12.2                 | < <b>0.001</b> |            |
|                                                | Small vs. Large         | - 15.5                 | < <b>0.001</b> |            |
|                                                | Medium vs. Medium-large | - 2.7                  | 1.00           |            |
|                                                | Medium vs. Large        | - 6.0                  | <b>0.05</b>    |            |
|                                                | Medium-large vs. Large  | - 3.3                  | 0.96           |            |

| <b>h) Regeneration of tripolar neurons</b> |                         |          |                        |                   |
|--------------------------------------------|-------------------------|----------|------------------------|-------------------|
| Factors                                    | <i>Df</i>               | <i>F</i> | <i>P</i>               | $\eta_p^2$        |
| • Observation time                         | 1.5,116.2               | 22.75    | <b>&lt; 0.001</b>      | 0.23              |
| • Starting size                            | 3,77                    | 54.18    | <b>&lt; 0.001</b>      | 0.68              |
| • Time x Size                              | 4.5,116.2               | 3.93     | <b>0.003</b>           | 0.13              |
| <i>Pairwise comparisons:</i>               |                         |          | <i>Mean difference</i> | <i>P</i>          |
| <i>(Time by Size)</i>                      |                         |          |                        |                   |
| Small:                                     | Time 0 cut vs. 24 hpa   |          | 0.9                    | 1.00              |
|                                            | Time 0 cut vs. 7 dpa    |          | 1.2                    | 1.00              |
|                                            | 24 hpa vs. 7 dpa        |          | 0.4                    | 1.00              |
| Medium:                                    | Time 0 cut vs. 24 hpa   |          | 4.4                    | <b>0.001</b>      |
|                                            | Time 0 cut vs. 7 dpa    |          | 4.2                    | 0.08              |
|                                            | 24 hpa vs. 7 dpa        |          | - 0.2                  | 1.00              |
| Medium-large:                              | Time 0 cut vs. 24 hpa   |          | 3.8                    | <b>0.013</b>      |
|                                            | Time 0 cut vs. 7 dpa    |          | 3.0                    | 0.46              |
|                                            | 24 hpa vs. 7 dpa        |          | - 0.8                  | 1.00              |
| Large:                                     | Time 0 cut vs. 24 hpa   |          | 6.8                    | <b>&lt; 0.001</b> |
|                                            | Time 0 cut vs. 7 dpa    |          | 10.2                   | <b>&lt; 0.001</b> |
|                                            | 24 hpa vs. 7 dpa        |          | 3.4                    | 0.055             |
| <i>(Size by Time)</i>                      |                         |          |                        |                   |
| Time 0 cut:                                | Small vs. Medium        |          | - 13.6                 | <b>&lt; 0.001</b> |
|                                            | Small vs. Medium-large  |          | - 23.9                 | <b>&lt; 0.001</b> |
|                                            | Small vs. Large         |          | - 38.3                 | <b>&lt; 0.001</b> |
|                                            | Medium vs. Medium-large |          | - 10.3                 | <b>0.03</b>       |
|                                            | Medium vs. Large        |          | - 24.7                 | <b>&lt; 0.001</b> |
|                                            | Medium-large vs. Large  |          | - 14.4                 | <b>0.001</b>      |
| 24 hpa:                                    | Small vs. Medium        |          | - 10.1                 | <b>0.003</b>      |
|                                            | Small vs. Medium-large  |          | - 21.1                 | <b>&lt; 0.001</b> |
|                                            | Small vs. Large         |          | - 32.4                 | <b>&lt; 0.001</b> |
|                                            | Medium vs. Medium-large |          | - 11.0                 | <b>0.005</b>      |
|                                            | Medium vs. Large        |          | - 22.3                 | <b>&lt; 0.001</b> |
|                                            | Medium-large vs. Large  |          | - 11.3                 | <b>0.004</b>      |
| 7 dpa:                                     | Small vs. Medium        |          | - 10.6                 | <b>0.003</b>      |
|                                            | Small vs. Medium-large  |          | - 22.2                 | <b>&lt; 0.001</b> |
|                                            | Small vs. Large         |          | - 29.3                 | <b>&lt; 0.001</b> |
|                                            | Medium vs. Medium-large |          | - 11.6                 | <b>0.005</b>      |
|                                            | Medium vs. Large        |          | - 18.7                 | <b>&lt; 0.001</b> |
|                                            | Medium-large vs. Large  |          | - 7.1                  | 0.22              |

**Fig. 5: Differential regenerative responses of longitudinal neurons are partially dependent on the size of the remnant fragment.** Repeated measure ANOVA analyses were performed for the data presented in Fig. 5c, e, g. Observation time served as the repeated measure for large animals with an aboral shift in cut site (c), medium animals with an oral shift in cut site (e), and small animals with an oral shift in cut site (g). Bonferroni post-hoc tests were used to evaluate pairwise differences when there was a significant main effect of observation time on the number of neurons observed. Dpa, days post amputation; hpa, hours post amputation.

| <b>c) Regeneration of large animals with aboral shift in cut site</b> |           |          |                        |                   |
|-----------------------------------------------------------------------|-----------|----------|------------------------|-------------------|
| Factors                                                               | <i>Df</i> | <i>F</i> | <i>P</i>               | $\eta_p^2$        |
| • Observation time                                                    | 2,14      | 5.58     | <b>0.017</b>           | 0.44              |
| <i>Pairwise comparisons:</i>                                          |           |          | <i>Mean difference</i> | <i>P</i>          |
| Time 0 cut vs. 24 hpa                                                 |           |          | 5.8                    | <b>0.04</b>       |
| Time 0 cut vs. 7 dpa                                                  |           |          | - 1.0                  | 1.00              |
| 24 hpa vs. 7 dpa                                                      |           |          | - 6.9                  | <b>0.046</b>      |
| <b>e) Regeneration of medium animals with oral shift in cut site</b>  |           |          |                        |                   |
| Factors                                                               | <i>Df</i> | <i>F</i> | <i>P</i>               | $\eta_p^2$        |
| • Observation time                                                    | 2,24      | 21.67    | <b>&lt; 0.001</b>      | 0.64              |
| <i>Pairwise comparisons:</i>                                          |           |          | <i>Mean difference</i> | <i>P</i>          |
| Time 0 cut vs. 24 hpa                                                 |           |          | 7.0                    | <b>&lt; 0.001</b> |
| Time 0 cut vs. 7 dpa                                                  |           |          | 7.1                    | <b>0.001</b>      |
| 24 hpa vs. 7 dpa                                                      |           |          | 0.05                   | 1.00              |
| <b>g) Regeneration of small animals with oral shift in cut site</b>   |           |          |                        |                   |
| Factors                                                               | <i>Df</i> | <i>F</i> | <i>P</i>               | $\eta_p^2$        |
| • Observation time                                                    | 2,24      | 8.56     | <b>0.002</b>           | 0.42              |
| <i>Pairwise comparisons:</i>                                          |           |          | <i>Mean difference</i> | <i>P</i>          |
| Time 0 cut vs. 24 hpa                                                 |           |          | 5.1                    | <b>&lt; 0.001</b> |
| Time 0 cut vs. 7 dpa                                                  |           |          | 2.9                    | 0.12              |
| 24 hpa vs. 7 dpa                                                      |           |          | -2.2                   | 0.47              |
